# Supplementary material for: Unravelling the early oxidation mechanism of zinc phosphide (Zn3P2) surfaces by adsorbed oxygen and water: a first-principles DFT-D3 investigation
Source: Royal Society of Chemistry journal article supplement (doi:10.1039/c9cp03902c), 2019-12-20

**Supporting Information for:**

**Unravelling the early oxidation Mechanism of zinc phosphide ( $\text{Zn}_3\text{P}_2$ ) surfaces by adsorbed oxygen and water: a first-principles DFT investigation**

*Nelson Y. Dzade\**

School of Chemistry, Cardiff University, Main Building, Park Place, CF10 3AT, Cardiff,  
United Kingdom

Email: [N.Y.Dzade@cardiff.ac.uk](mailto:N.Y.Dzade@cardiff.ac.uk)

This supporting information contains the unrelaxed and relaxed structures of all unique terminations of the (001), (101), and (110)  $\text{Zn}_3\text{P}_2$  surfaces. The predicted unrelaxed and relaxed surface energies are also displayed.

**Figure S1:** Unrelaxed and relaxed structures of the three unique terminations of  $\text{Zn}_3\text{P}_2$  (001) surface of (Colour scheme: Zn = blue, and S = orange).

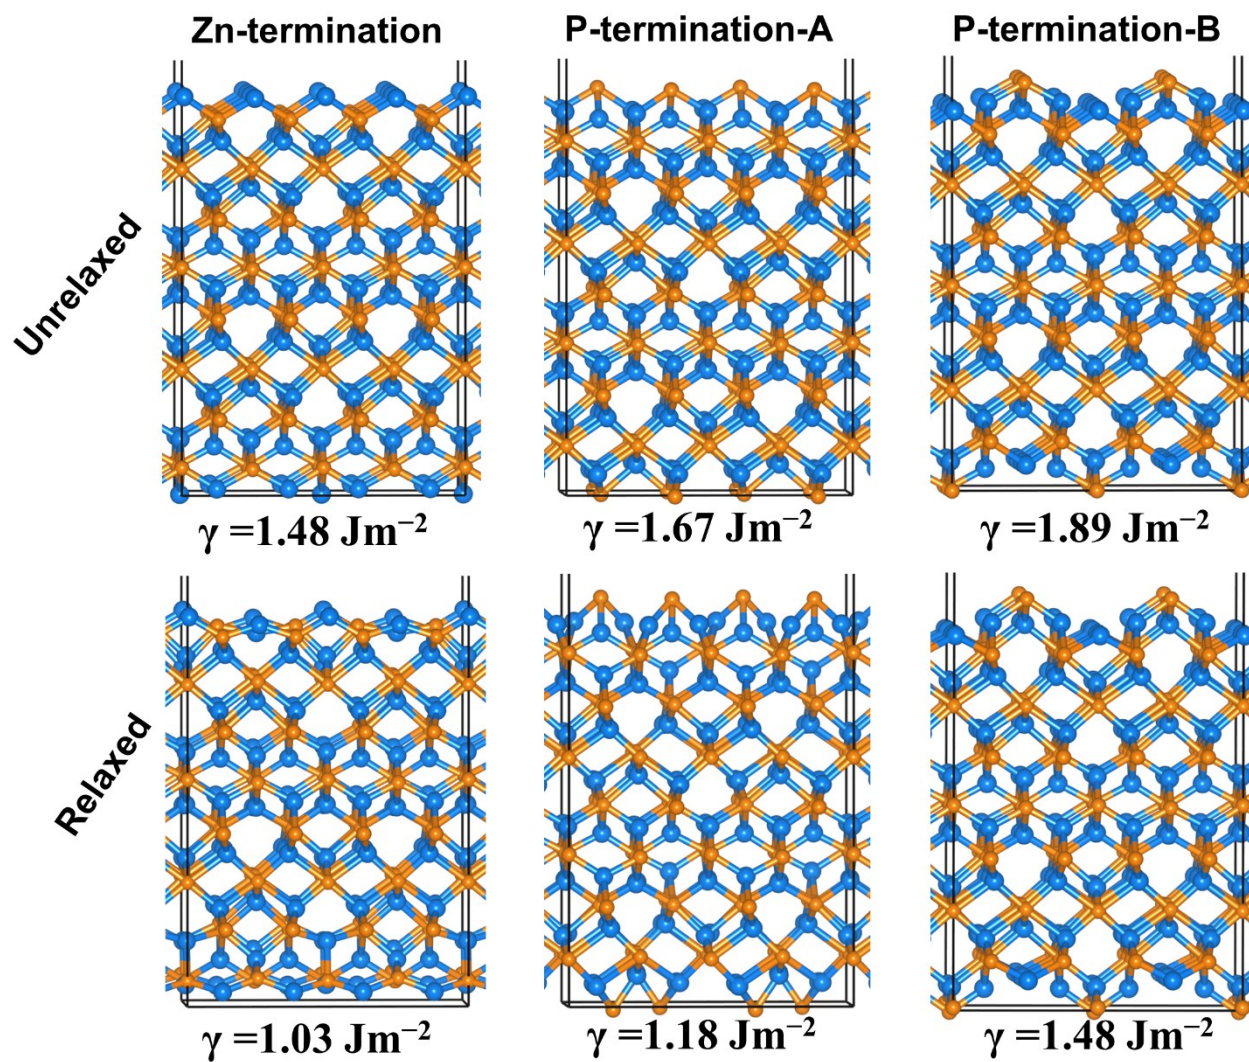

**Figure S2:** Unrelaxed and relaxed structures of the two unique terminations of  $\text{Zn}_3\text{P}_2$  (101) surface of (Colour scheme: Zn = blue, and S = orange).

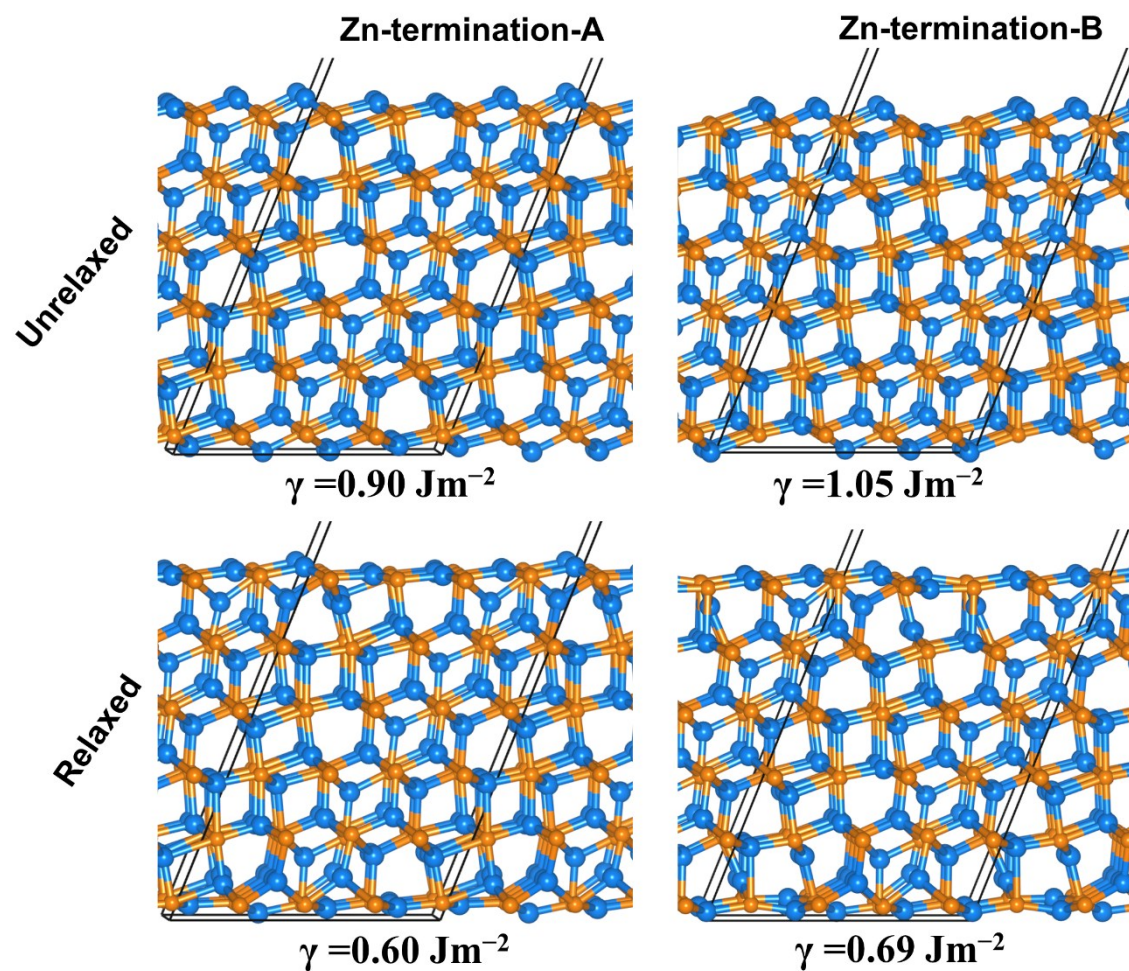



**Figure S3:** Unrelaxed and relaxed structures of the two unique terminations of  $\text{Zn}_3\text{P}_2$  (110) surface of (Colour scheme: Zn = blue, and S = orange).

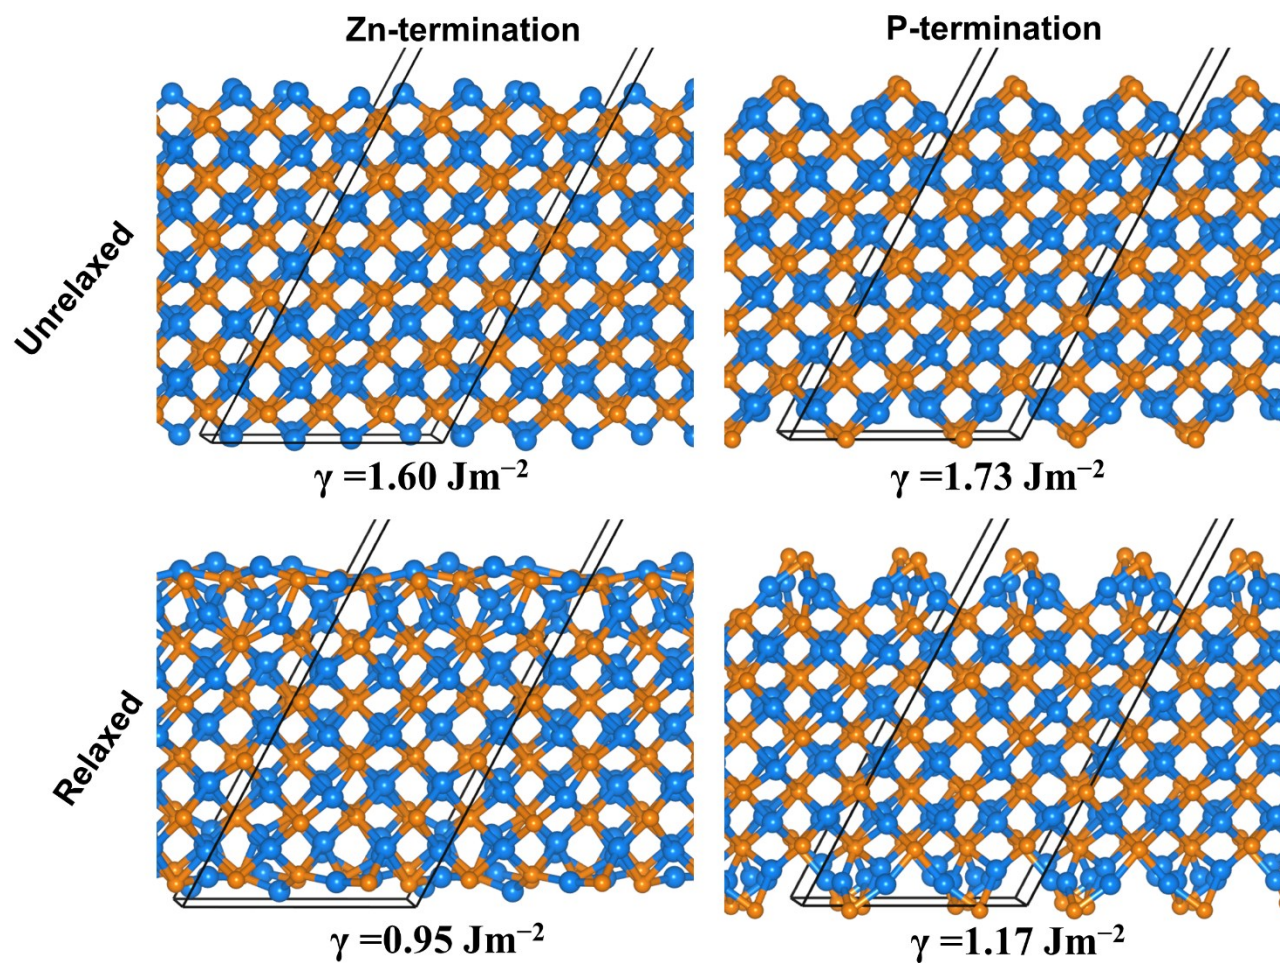

Supplement: c9cp03902c1.pdf [file c9cp03902c1.pdf]
